# Supplementary material
Source: PubMed Central journal article supplement (PMC3053283)
Supplement: 10-5944_z7g999111011st01.pdf [file 10-5944_z7g999111011st01.pdf]

1 **Supplementary Materials**  
 2 **Table S1:** Criteria for scoring of ocular parameters

| Ocular parameters          | Clinical scores                                                                                                                     |                                                                                                             |                                                                                                                                         |                                                                                                                                            |
|----------------------------|-------------------------------------------------------------------------------------------------------------------------------------|-------------------------------------------------------------------------------------------------------------|-----------------------------------------------------------------------------------------------------------------------------------------|--------------------------------------------------------------------------------------------------------------------------------------------|
|                            | 0<br>(symptomatic of naïve uninfected with no manifestations)                                                                       | +1<br>(slight manifestations)                                                                               | +2<br>(moderate manifestations)                                                                                                         | +3<br>(severe manifestations)                                                                                                              |
| Scleral inflammation       | No redness, no prominent blood vessels and no chemosis                                                                              | Reddish tinge, blood vessels more visible and localized chemosis                                            | Red, prominent blood vessel network and localized chemosis                                                                              | Hyperemia with individual blood vessels indistinguishable and chemosis                                                                     |
| Ocular neovascularization  | No visible blood vessels                                                                                                            | Developing blood vessel network with <25% of the surface affected                                           | Blood vessel network with 26-75% of the surface affected                                                                                | Prominent blood vessel network with >75% of the surface vascularized                                                                       |
| Friability of vasculature* | Nictitating membrane and inside of lower eyelid do not show any sign of bleeding and no coloration on cotton surface after swabbing | Nictitating membrane and inside of lower eyelid inflamed and reddish tinge on cotton surface after swabbing | Nictitating membrane and inside of lower eyelid show sparse flecks of blood and red coloration on ~50% of cotton surface after swabbing | Nictitating membrane and inside of lower eyelid show ooze of reddish watery fluid and red coloration >50% of cotton surface after swabbing |
| Inflammatory discharge     | No mucous discharge                                                                                                                 | Mucous discharge collecting at the caruncle and lacrimal apparatus                                          | Mucous discharge collecting at the caruncle, lacrimal apparatus and eyelid margin                                                       | Mucous discharge collecting at the adnexa and causing periocular fur to be matted down (pseudo-membranes)                                  |
| Eyelid inflammation        | Eyelid margins thin with no visible redness                                                                                         | Eyelid margins showing localized swelling and redness                                                       | Eyelid margins showing localized swelling and visible blood vessel network                                                              | Eyelid margins swollen, red and engorged outer parts of eyelids                                                                            |
| Epiphora                   | Moist corneal surface                                                                                                               | Watery fluid collection mainly at the lower eyelid margin                                                   | Watery fluid collection mainly at the lower eyelid margin and wetness of the entire outer part of eyelids                               | Watery fluid collection mainly at the lower eyelid margin, wetness of the entire outer part of eyelids and pseudo-membranes                |

3 \* Term used to describe blood collecting under and around the inside of the nictitating  
 4 membrane and lower eyelid  
 5  
 6  
 7
