# Supplementary material
Source: PubMed Central journal article supplement (PMC3053283)
Supplement: 10-5944_z7g999111011st02.pdf [file 10-5944_z7g999111011st02.pdf]

- 1 **Table S2:** Cumulative efficacy of drugs in reducing adenoviral keratoconjunctivitis  
 2 clinical symptoms

| Ocular parameters (measure) <sup>2</sup> | Drugs treatments <sup>1</sup> |          |       |                |
|------------------------------------------|-------------------------------|----------|-------|----------------|
|                                          | FST-100                       | Tobradex | BSS   | 0.5% Cidofovir |
| (1) Scleral inflammation                 | 11 <sup>3</sup>               | 27       | 45    | 107            |
| (2) Ocular neovascularization            | 41                            | 58       | 79    | 120            |
| (3) Friability of vasculature            | 11                            | 81       | 80    | 72             |
| (4) Inflammatory discharge               | 1                             | 2        | 8     | 18             |
| (5) Eyelid inflammation                  | 5                             | 18       | 27    | 85             |
| (6) Epiphora                             | 5                             | 13       | 28    | 94             |
| Cumulative data (1-6) <sup>4</sup>       | 54                            | 174      | 267   | 496            |
| Relative difference compared to FST-100  | 100%                          | +320%    | +490% | +920%          |

Cumulative data on slit lamp examination for scoring of eyes and ocular adnexa of rabbit corneas infected with adenovirus type 5

<sup>1</sup>Treatment period beginning 12 hours after adenovirus inoculation and continued for 7 consecutive days.

<sup>2</sup>Scoring for 9 days starting at the time of adenovirus inoculation for each clinical parameter.

<sup>3</sup>Sum of individual scores provide cumulative contributions for all clinical parameters.

<sup>4</sup>Cumulative data (1-6) is the sum of all six clinical parameters for all days.

3

4

5
